# Supplementary material for: One-step synthesis of amino-functionalized up-converting NaYF4:Yb,Er nanoparticles forin vitrocell imaging
Source: Royal Society of Chemistry journal article supplement (doi:10.1039/c8ra04178d), 2018-01-01
Supplement: c8ra04178d1.pdf [file c8ra04178d1.pdf]

## Supplementary file

### One-step synthesis of amino-functionalized up-converting NaYF<sub>4</sub>:Yb,Er nanoparticles for *in vitro* cell imaging

Lidija Mancic, Aleksandra Djukic-Vukovic, Ivana Dinic, Marko G. Nikolic, Mihailo D. Rabasovic, Aleksandar J. Krmpot,  
Antonio M.L.M. Costa, Bojan A. Marinkovic, Ljiljana Mojovic, Olivera Milosevic

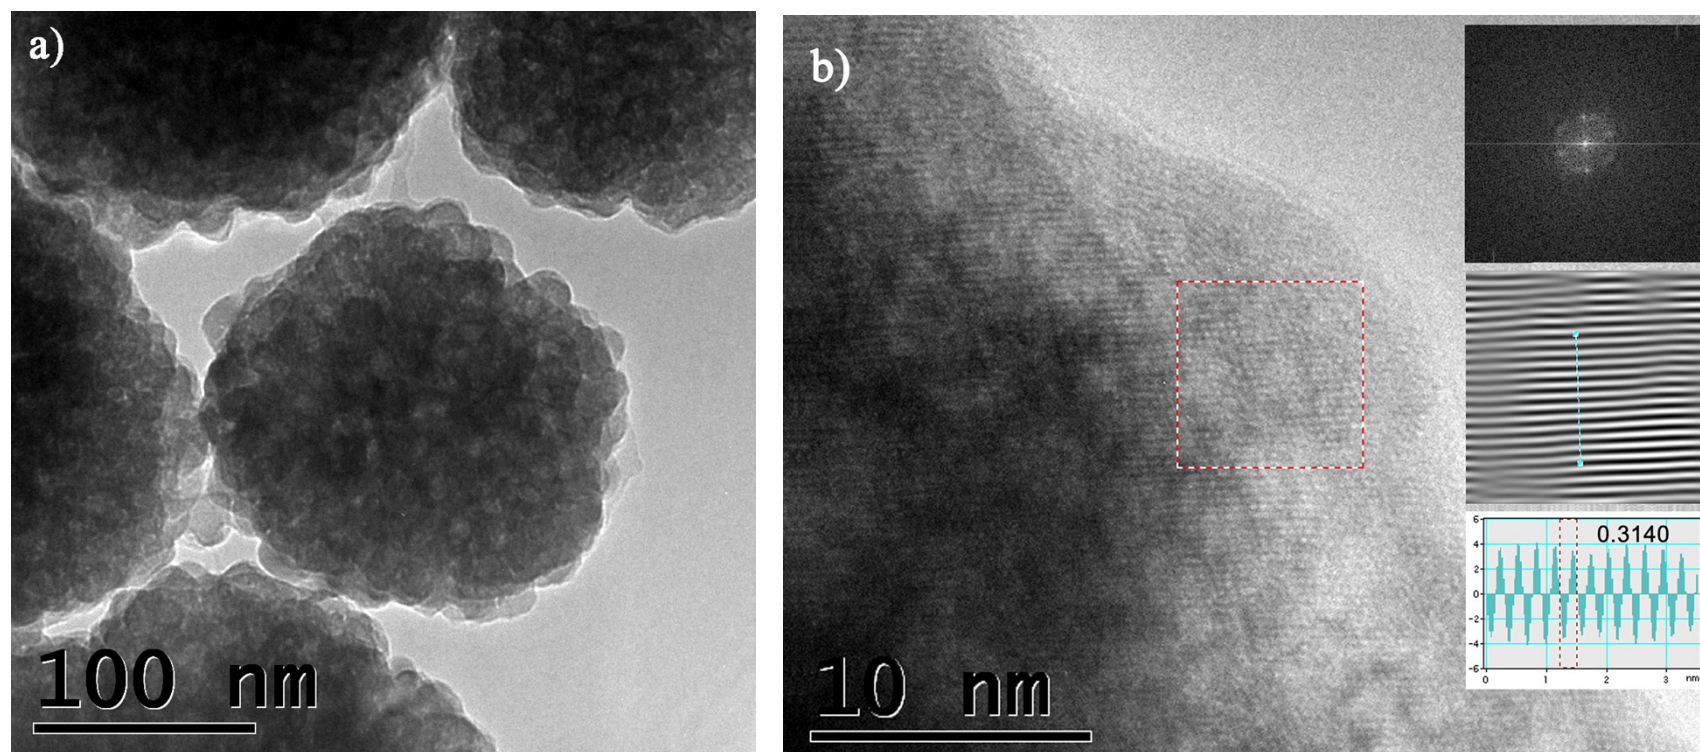

**Fig. S1.** TEM (a) and HRTEM (b) images of amino modified NaYF<sub>4</sub>:Yb,Er UCNPs. Corresponding FFT/IFFT given as insets in b, confirms that much smaller crystallites notable at the particles surfaces (a) revealed periodic array of cubic  $\alpha$  phase, (111) plane with  $d$  value of 3.140 Å

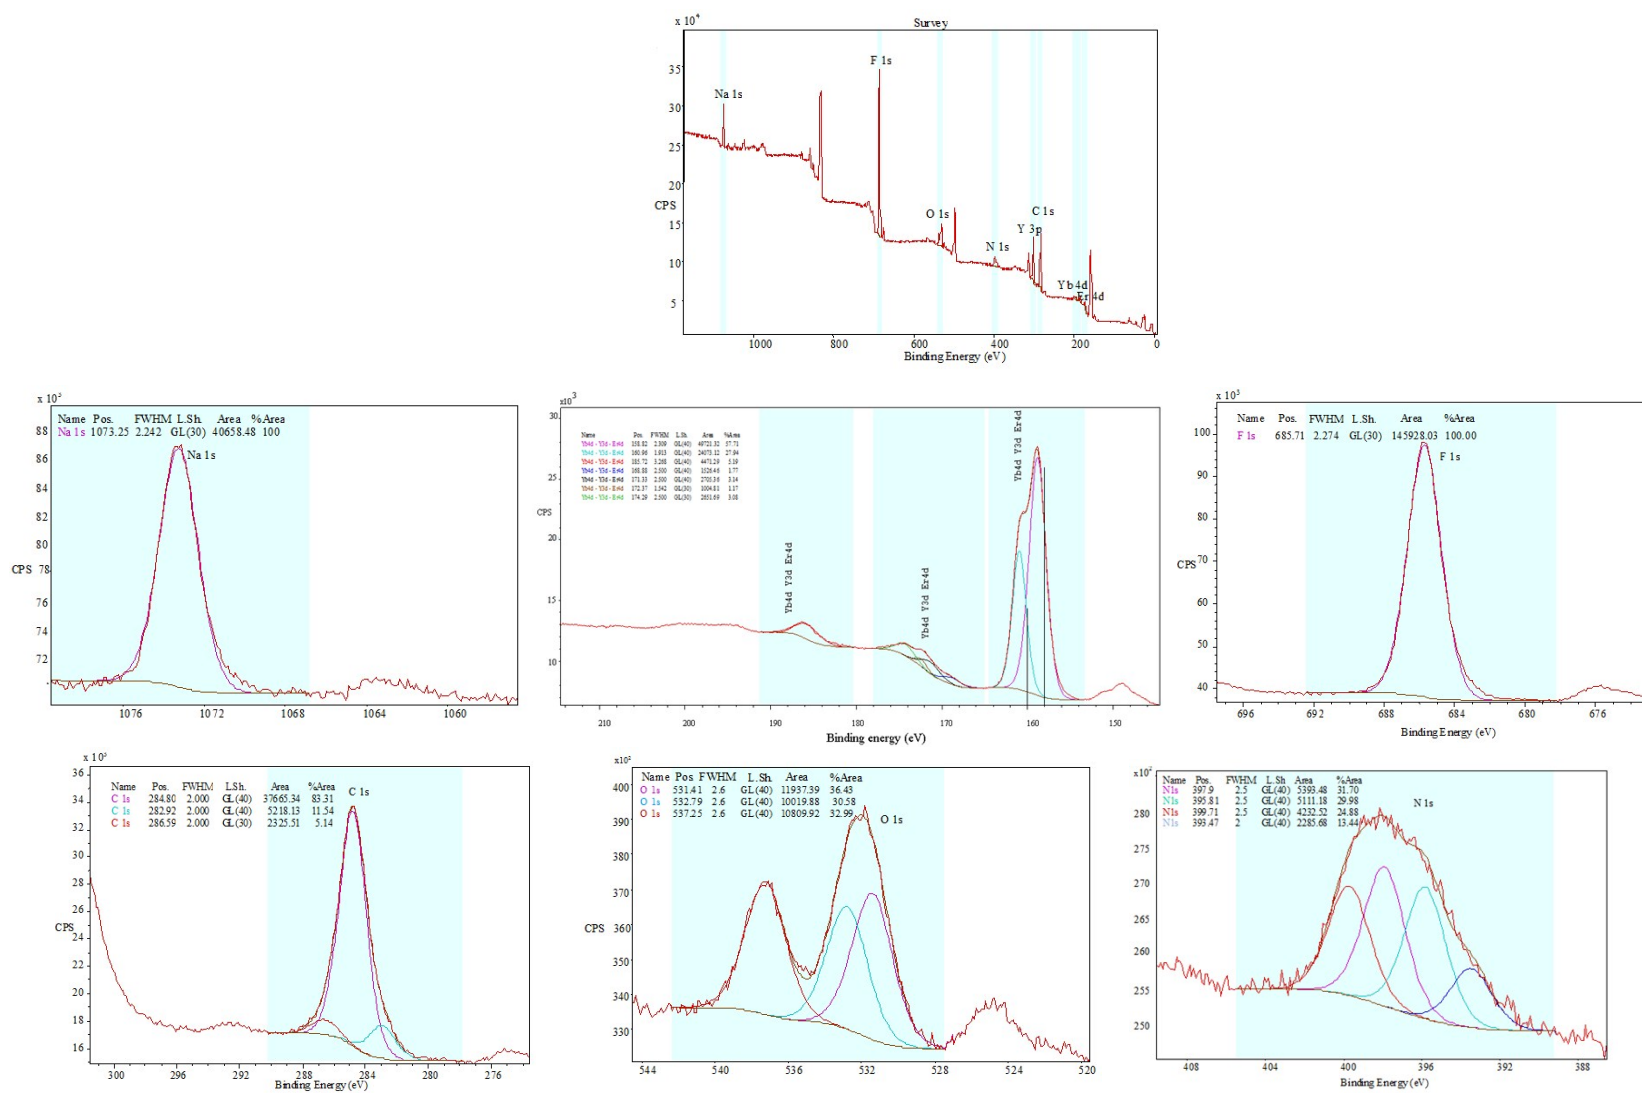

**Fig. S2.** XPS spectrum of amino-functionalized NaYF<sub>4</sub>:Yb,Er UCNPs: survey spectrum and fine-scan spectra of Na 1s, Y 3d, Yb 4d, Er 4d, F 1s and decomposed ones of C 1s, O 1s and N 1s.

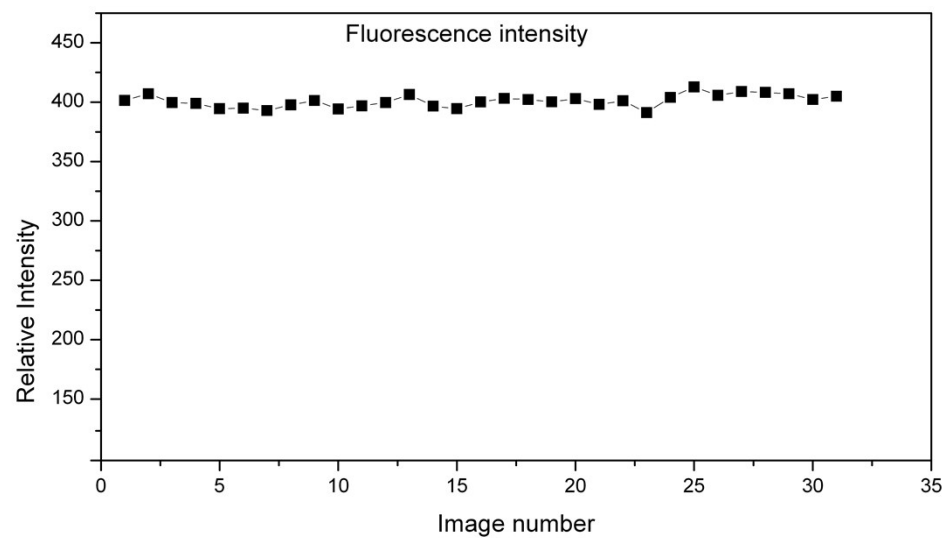

**Fig. S3.** Photostability of amino-functionalized up-converting NaYF<sub>4</sub>:Yb,Er nanoparticles. The emission intensity was traced during 1h
